# Supplementary material for: Influence of Temperature on Age-Stage, Two-Sex Life Tables for a Minnesota-Acclimated Population of the Brown Marmorated Stink Bug (Halyomorpha halys)
Source: MDPI journal article supplement (doi:10.3390/insects11020108), 2020-02-07
Supplement: s1 [file s1]

## Supplementary Material

### Influence of Temperature on Age-Stage, Two-Sex Life Tables for a Minnesota-Acclimated Population of the Brown Marmorated Stink Bug, (*Halyomorpha halys*)

Byju N. Govindan, and William. D. Hutchison

Department of Entomology, University of Minnesota, St. Paul, MN 55108, USA

The supplementary material tables (**Table S1, S2 and S3**) and one figure (**Figure S1**) are provided to summarize additional information to support our findings from the research on “Influence of Temperature on Age-Stage, Two-Sex Life Tables for a Minnesota-Acclimated Population of the Brown Marmorated Stink Bug, (*Halyomorpha halys*). **Table S1** presents information on stage specific survival (%) and egg-adult survival (%); the egg-adult survival peaks to 96% at 27 °C and declined towards both lower and upper temperature extremes of 15 °C and 36 °C, respectively. **Table S2** presents estimated parameters from non-linear models fit to data on intrinsic rate of increase for *H. Halys* using the *devRate* [1] and *OPTIMSSI* [2] package for R. The Ratkowsky model [3] with the lowest AIC (-59.52) among all models best fitted the data. **Table S3** is a compilation of mean developmental time (days) and egg-adult survival (%) for the MN and the PA acclimated *H. halys* at constant temperatures. Mean development times for the two populations are compared ( $\alpha = 0.05$ ) using independent two-sample Student’s t-test or Welch’s t-test, depending on whether sample variances are equal or unequal, respectively. **Figure S1** presents Sharpe-Schoolfield-Ikemoto (SSI) model fit to data on intrinsic rate of increase for *H. Halys*, and it was the best among all models (AIC= -56.24) when biological significance of parameters is also accounted as a model selection criteria [4].

**Supplementary Tables**

**Table S1.** Stage-specific apparent survival (%) and the cohort-specific total survival (%)

**Table S2.** Estimated parameters from models fit to assess temperature-dependency of intrinsic rate of increase for *Halyomorpha halys* using the *devRate* and *OPTIMSSI* package for R, and the corresponding AIC values for each model

**Table S3.** Mean developmental time (days  $\pm$  standard error) and egg-adult survival (%) for the MN and the PA acclimated *H. halys* at constant temperatures. For the PA population, data is adapted from Nielsen *et al.* (2008)

**Supplementary Figure**

**Figure S1.** Effect of temperature on intrinsic rate of increase of *H. halys*, as described by the Sharpe-Schoolfield-Ikemoto (SSI) model, where maximum rate of increase is estimated to occur at 28.03 °C

**Table S1.** Stage-specific apparent survival (%) and the cohort-specific total survival (%)

| Temperature<br>(°C) | n   | Egg    | First<br>Instar | Second<br>Instar | Third<br>Instar | Fourth<br>Instar | Fifth<br>Instar | Cohort-specific<br>Survival |
|---------------------|-----|--------|-----------------|------------------|-----------------|------------------|-----------------|-----------------------------|
| 15                  | 59  | 69.41  | 96.61           | 2.00             | 0.00            | -                | -               | 0.00                        |
| 17                  | 50  | 100.00 | 66.00           | 87.88            | 75.86           | 63.64            | 64.29           | 18.00                       |
| 20                  | 35  | 100.00 | 96.55           | 100.00           | 96.43           | 88.89            | 100.00          | 68.00                       |
| 23                  | 51  | 100.00 | 100.00          | 100.00           | 82.76           | 82.76            | 82.76           | 82.00                       |
| 25                  | 51  | 100.00 | 100.00          | 96.08            | 98.00           | 95.83            | 95.65           | 86.00                       |
| 27                  | 50  | 100.00 | 100.00          | 96.00            | 100.00          | 100.00           | 97.92           | 96.00                       |
| 30                  | 50  | 100.00 | 100.00          | 96.00            | 93.75           | 95.56            | 93.02           | 80.00                       |
| 33                  | 56  | 91.07  | 100.00          | 96.08            | 71.43           | 82.86            | 17.24           | 10.00                       |
| 36                  | 133 | 62.41  | 55.42           | 63.04            | 41.38           | 41.67            | 50.00           | 2.00                        |

**Table S2.** Estimated parameters from models fit to assess temperature-dependency of intrinsic rate of increase for *Halyomorpha halys* using the *devRate* and *OPTIMSSI* package for R, and the corresponding AIC values for each model

| Sl. No.                      | Model                                                                                                                                        | Parameters                                                                                                                                  | AIC           |
|------------------------------|----------------------------------------------------------------------------------------------------------------------------------------------|---------------------------------------------------------------------------------------------------------------------------------------------|---------------|
| <b>devRate Package in R:</b> |                                                                                                                                              |                                                                                                                                             |               |
| 1                            | Taylor_81:<br>$rT \sim R_m * \exp(-1/2 * ((T - T_m)/T_o)^2)$                                                                                 | $R_m = 0.0934$<br>$T_m = 26.9894$<br>$T_o = 4.2276$                                                                                         | -44.41        |
| 2                            | Lactin_95:<br>$rT \sim \exp(aa * T) - \exp(aa * T_{max} - (T_{max} - T)/\delta T)$                                                           | $aa = 0.1643$<br>$T_{max} = 35.7889$<br>$\delta T = 6.0816$                                                                                 | -29.20        |
| 3                            | Logan6_76:<br>$rT \sim \phi * (\exp(bb * T) - \exp(bb * T_{max} - (T_{max} - T)/\delta T))$                                                  | $\phi = 0.0484$<br>$bb = 0.1665$<br>$T_{max} = 35.7791$<br>$\delta T = 5.9433$                                                              | -27.21        |
| 4                            | <b>Ratkowsky_83:</b><br>$rT \sim (cc * (T - T_1) * (1 - \exp(k * (T - T_2))))^2$                                                             | <b><math>cc = 0.0540</math></b><br><b><math>T_1 = 15.6621</math></b><br><b><math>T_2 = 35.9606</math></b><br><b><math>k = 0.0749</math></b> | <b>-59.52</b> |
| 5                            | Beta_16:<br>$rT \sim r_m * (T_2 - T)/(T_2 - T_m) * ((T - T_1)/(T_m - T_1))^{((T_m - T_1)/(T_2 - T_m))}$                                      | $r_m = 0.0824$<br>$T_1 = 17.0000$<br>$T_2 = 35.8232$<br>$T_m = 27.8516$                                                                     | -40.45        |
| 6                            | Beta_95:<br>$rT \sim \exp(\mu) * (T - T_b)^{aa} * (T_c - T)^{bb}$                                                                            | $\mu = -13.663$<br>$T_b = 14.424$<br>$T_c = 36.00$<br>$aa = 2.833$<br>$bb = 1.858$                                                          | -54.04        |
| 7                            | Performance-2:<br>$rT \sim cc * (T - T_1) * (1 - \exp(k * (T - T_2)))$                                                                       | $cc = 0.0271$<br>$T_1 = 17.2861$<br>$k = 0.0413$<br>$T_2 = 35.7893$                                                                         | -39.70        |
| 8                            | Root square:<br>$rT \sim (bb * (T - T_b))^2$                                                                                                 | $bb = 7.938e-04$<br>$T_b = -2.299e+02$                                                                                                      | -21.96        |
| 9                            | Wangengel_98:<br>$rT \sim (2 * (T - T_{min})^{aa} * (T_{opt} - T_{min})^{aa} - (T - T_{min})^{(2 * aa)}) / ((T_{opt} - T_{min})^{(2 * aa)})$ | $aa = 3.965e-01$<br>$T_{min} = 1.700e+01$<br>$T_{opt} = 1.356e+05$                                                                          | -20.50        |
| 10                           | Regniere_12:                                                                                                                                 | $T_b = 16.4650$<br>$T_m = 35.9889$<br>$\phi = -0.4248$                                                                                      | -50.91        |

|    |                                                                                                                                                                                                |                                                                                                                           |        |
|----|------------------------------------------------------------------------------------------------------------------------------------------------------------------------------------------------|---------------------------------------------------------------------------------------------------------------------------|--------|
|    | $rT \sim \phi * (\exp(bb * (T - T_b)) - ((T_m - T)/(T_m - T_b)) * \exp(-bb * (T - T_b)/\text{deltab}) - ((T - T_b)/(T_m - T_b)) * \exp(bb * (T_m - T_b) - (T_m - T)/\text{deltam}))$           | $bb = 0.1149$<br>$\text{deltab} = -0.6501$<br>$\text{deltam} = 4.1917$                                                    |        |
| 11 | Stinner_74:<br>eqn. 1: $rT \sim C/(1 + \exp(k_1 + k_2 * T))$<br>eqn. 2: $rT \sim C/(1 + \exp(k_1 + k_2 * (2 * T_{opt} - T)))$                                                                  | Did not converge                                                                                                          | NA     |
| 12 | Logan10_76:<br>$rT \sim \alpha * (1/(1 + cc * \exp(-bb * T)) - \exp(-((T_{max} - T)/\text{deltaT})))$                                                                                          | $\alpha = 0.1981$<br>$bb = 0.3488$<br>$cc = 1865.9861$<br>$T_{max} = 35.8791$<br>$\text{deltaT} = 10.6802$                | -43.68 |
| 13 | SharpeDeMichele_77:<br>$rT \sim ((T + 273.16) * \exp((aa - bb/(T + 273.16))/1.987))/(1 + \exp((cc - dd/(T + 273.16))/1.987) + \exp((ff - gg/(T + 273.16))/1.987))$                             | $aa = 37.27$<br>$bb = 16022.62$<br>$cc = -855.38$<br>$dd = -250493.15$<br>$ff = 436.03$<br>$gg = 132644.05$               | -49.12 |
| 14 | Analytis_77:<br>$rT \sim aa * (T - T_{min})^{bb} * (T_{max} - T)^{cc}$                                                                                                                         | $T_{min} = 1.073e+01$<br>$T_{max} = 3.600e+01$<br>$aa = 1.244e-04$<br>$bb = 1.819e+00$<br>$cc = 5.584e-01$                | -27.94 |
| 15 | Schoolfield_81:<br>$rT \sim (p_{25} * (T + 273.16)/298 * \exp(aa/1.987 * (1/298 - 1/(T + 273.16))))/(1 + \exp(bb/1.987 * (1/cc - 1/(T + 273.16))) + \exp(dd/1.987 * (1/ee - 1/(T + 273.16))))$ | $p_{25} = 7.391e-02$<br>$aa = 1.602e+04$<br>$bb = -2.505e+05$<br>$cc = 2.928e+02$<br>$dd = 1.326e+05$<br>$ee = 3.042e+02$ | -49.12 |
| 16 | SchoolfieldHigh_81:<br>$rT \sim (p_{25} * (T + 273.16)/298 * \exp(aa/1.987 * (1/298 - 1/(T + 273.16))))/(1 + \exp(dd/1.987 * (1/ee - 1/(T + 273.16))))$                                        | $p_{25} = 7.501e-02$<br>$aa = 3.564e+04$<br>$dd = 1.159e+05$<br>$ee = 3.023e+02$                                          | -37.88 |
| 17 | SchoolfieldLow_81:<br>$rT \sim (p_{25} * (T + 273.16)/298 * \exp(aa/1.987 * (1/298 - 1/(T + 273.16))))/(1 + \exp(bb/1.987 * (1/cc - 1/(T + 273.16))))$                                         | $p_{25} = 1.208e+00$<br>$aa = -8.026e+04$<br>$bb = -1.159e+05$<br>$cc = 3.023e+02$                                        | -37.88 |
| 18 | Poly2:<br>$rT \sim a_0 + a_1 * T + a_2 * T^2$                                                                                                                                                  | $a_0 = -0.5850$<br>$a_1 = 0.04983$<br>$a_2 = -0.0009$                                                                     | -40.05 |
| 19 | HarcourtYee_82:<br>$rT \sim a_0 + a_1 * T + a_2 * T^2 + a_3 * T^3$                                                                                                                             | $a_0 = -2.054e-01$<br>$a_1 = 3.799e-03$<br>$a_2 = 8.588e-04$<br>$a_3 = -2.249e-05$                                        | -40.16 |

|    |                                                                                                                 |                                                                                                         |        |
|----|-----------------------------------------------------------------------------------------------------------------|---------------------------------------------------------------------------------------------------------|--------|
| 20 | Poly4:<br>$rT \sim a0 + a1 * T + a2 * T^2 + a3 * T^3 + a4 * T^4$                                                | $a0 = 2.973e+00$<br>$a1 = -5.137e-01$<br>$a2 = 3.165e-02$<br>$a3 = -8.167e-04$<br>$a4 = 7.505e-06$      | -49.97 |
| 21 | HilbertLogan_83:<br>$rT \sim \phi * (((T - Tb)^2 / ((T - Tb)^2 + aa^2)) - \exp(-(Tmax - (T - Tb)) / \delta T))$ | $\phi = 0.275$<br>$aa = 10.902$<br>$Tb = 13.604$<br>$Tmax = 24.128$<br>$\delta T = 9.025$               | -39.33 |
| 22 | Lamb_92[[1]]:<br>$rT \sim Rm * \exp(-1/2 * ((T - Tmax) / To)^2)$                                                | $Rm = 0.0934$<br>$Tmax = 26.9894$<br>$To = -4.2276$                                                     | -44.41 |
| 23 | Lamb_92[[2]]:<br>$rT \sim Rm * \exp(-1/2 * ((T - Tmax) / To)^2)$                                                | $Rm = 0.0934$<br>$Tmax = 26.9894$<br>$To = -4.2276$                                                     | -44.41 |
| 24 | Lactin1_95:<br>$rT \sim \exp(aa * T) - \exp(aa * Tmax - (Tmax - T) / \delta T)$                                 | $aa = 0.1643$<br>$Tmax = 35.7889$<br>$\delta T = 6.0816$                                                | -29.20 |
| 25 | Lactin2_95:<br>$rT \sim \exp(aa * T) - \exp(aa * Tmax - (Tmax - T) / \delta T) + bb$                            | $aa = 0.0288$<br>$bb = -1.0623$<br>$Tmax = 51.3935$<br>$\delta T = 16.8618$                             | -39.35 |
| 26 | Briere1_99:<br>$rT \sim aa * T * (T - Tmin) * (Tmax - T)^{(1/2)}$                                               | $aa = 6.991e-05$<br>$Tmax = 3.600e+01$<br>$Tmin = 1.544e+01$                                            | -29.12 |
| 27 | Briere2_99:<br>$rT \sim aa * T * (T - Tmin) * (Tmax - T)^{(1/bb)}$                                              | $aa = 1.892e-05$<br>$bb = 7.748e-01$<br>$Tmax = 3.600e+01$<br>$Tmin = 1.743e+01$                        | -42.66 |
| 28 | Kontodimas_04:<br>$rT \sim aa * (T - Tmin)^2 * (Tmax - T)$                                                      | $aa = 5.208e-05$<br>$Tmax = 3.568e+01$<br>$Tmin = 1.382e+01$                                            | -37.85 |
| 29 | Damos_08:<br>$rT \sim aa * (bb - T/10) * (T/10)^{cc}$                                                           | $aa = -2.351$<br>$bb = 1.721$<br>$cc = -3.707$                                                          | -24.83 |
| 30 | Damos_11:<br>$rT \sim aa / (1 + bb * T + cc * T^2)$                                                             | $aa = 0.0025$<br>$bb = -0.0716$<br>$cc = 0.0013$                                                        | -34.86 |
| 31 | Wang_82:<br>$rT \sim (K / (1 + \exp(-r * (T - T0)))) * (1 - \exp(-(T - TL) / aa)) * (1 - \exp(-(TH - T) / aa))$ | $K = 55.1509$<br>$r = 0.4752$<br>$aa = 447.4390$<br>$TL = -20.5821$<br>$T0 = 23.6922$<br>$TH = 35.8769$ | -41.40 |
| 32 | Bayoh and Lindsay (bayoh_03):                                                                                   | $aa = 2.927e-02$                                                                                        | -26.11 |

|                               |                                                                                                                                                                                                                                                                                                                                                             |                                                                                                                                                                                                         |        |
|-------------------------------|-------------------------------------------------------------------------------------------------------------------------------------------------------------------------------------------------------------------------------------------------------------------------------------------------------------------------------------------------------------|---------------------------------------------------------------------------------------------------------------------------------------------------------------------------------------------------------|--------|
|                               | $rT \sim aa + bb * T + cc * \exp(T) + dd * \exp(-T)$                                                                                                                                                                                                                                                                                                        | $bb = 1.147e-03$<br>$cc = -1.670e-17$<br>$dd = -1.203e+06$                                                                                                                                              |        |
| 33                            | Wagner_88<br>$rT \sim 1/((1 + \exp((cc/1.987) * ((1/dd) - (1/(T + 273.16)))))) / (aa * (T + 273.16)/298.15 * \exp((bb/1.987) * ((1/298.15) - 1/(T + 273.16))))$                                                                                                                                                                                             | $aa = 7.736e-02$<br>$bb = 3.564e+04$<br>$cc = 1.159e+05$<br>$dd = 3.023e+02$                                                                                                                            | -37.88 |
| 34                            | Bieri1_83:<br>$rT \sim aa * (T - T_{min}) - (bb * \exp(T - T_m))$                                                                                                                                                                                                                                                                                           | Did not converge                                                                                                                                                                                        | NA     |
| <b>OPTIMSSI Package in R:</b> |                                                                                                                                                                                                                                                                                                                                                             |                                                                                                                                                                                                         |        |
| 35.                           | Sharpe-Schoolfield-Ikemoto model:<br>$r(T) = \frac{\rho_{\phi} \frac{T}{T_{\phi}} \exp \left[ \frac{\Delta H_A}{R} \left[ \frac{1}{T_{\phi}} - \frac{1}{T} \right] \right]}{1 + \exp \left[ \frac{\Delta H_L}{R} \left[ \frac{1}{T_L} - \frac{1}{T} \right] \right] + \exp \left[ \frac{\Delta H_H}{R} \left[ \frac{1}{T_H} - \frac{1}{T} \right] \right]}$ | $T_{\phi} = 2.959408e+02$<br>$\rho_{\phi} = 5.436652e-02$<br>$\Delta H_A = 2.841494e+04$<br>$\Delta H_L = -2.846197e+05$<br>$\Delta H_H = 1.241860e+05$<br>$T_L = 2.925017e+02$<br>$T_H = 3.029137e+02$ | -56.24 |

81

82

83 Note 1: The Ratkowsky non-linear empirical model [3], with the lowest AIC (-59.52) among all  
84 models considered [1], best described the relation between temperature and intrinsic rate of  
85 increase for *H. halys*. The  $r_m$  was maximized (0.0899 day<sup>-1</sup>) at 27.49°C.

86 Note 2: The Sharpe-Schoolfield-Ikemoto (SSI) non-linear biophysical model [2] based on  
87 enzyme kinetics approach provided the next best fit (AIC = -56.24). If the ability to estimate  
88 parameters of biological significance is also accounted as a model selection criteria [4], the best  
89 fit model was SSI model (**Figure S1**). The  $r_m$  was maximized (0.0983 day<sup>-1</sup>) at 28.03°C.

90

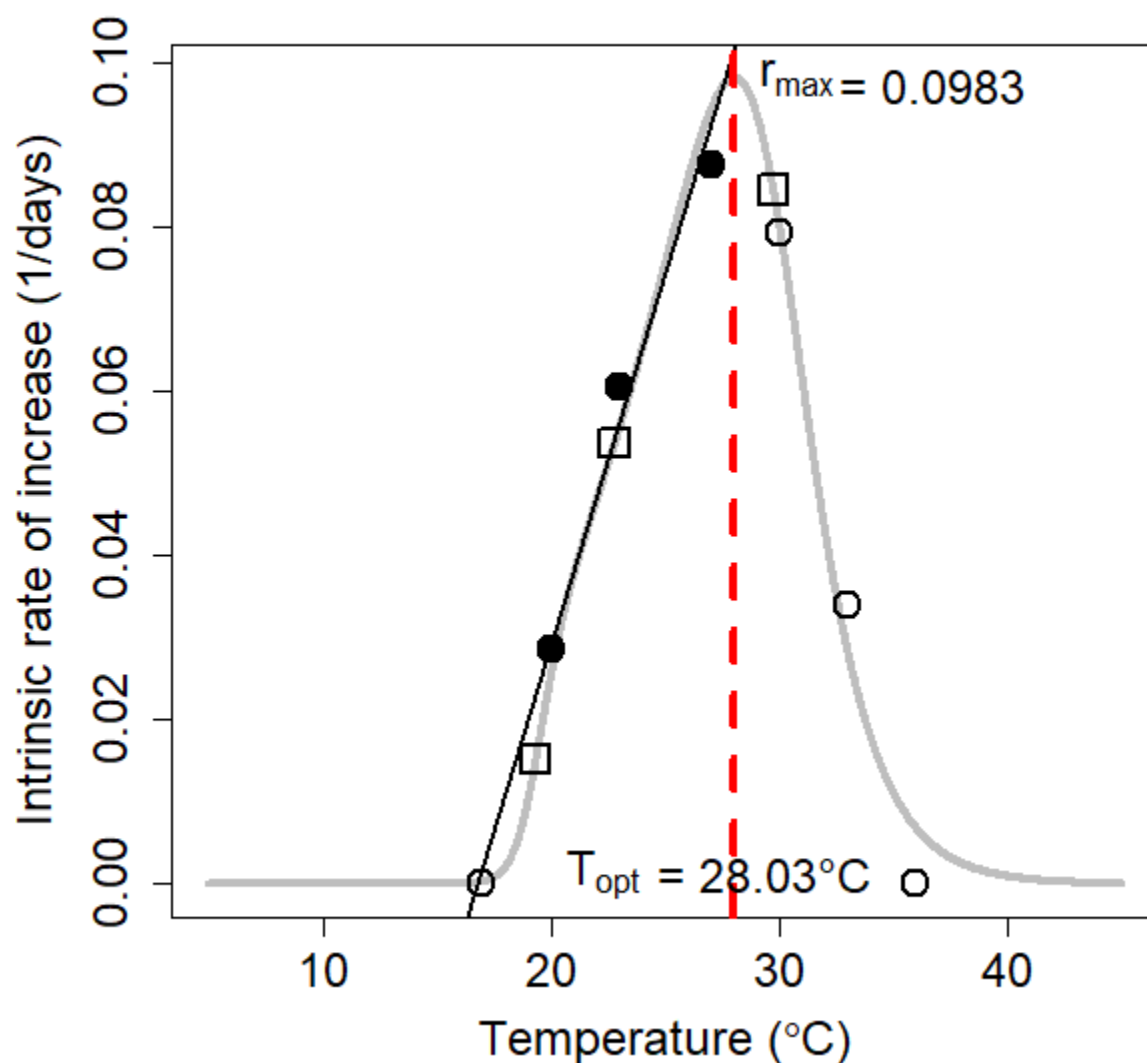

**Figure S1.** Effect of temperature on intrinsic rate of increase of *H. halys*, as described by the Sharpe-Schoolfield-Ikemoto (SSI) model, where maximum rate of increase is estimated to occur at 28.03 °C

99 **Table S3.** Mean developmental time (days  $\pm$  standard error) and egg-adult survival (%) for the MN and the PA acclimated *H. halys* at  
 100 constant temperatures. For the PA population, data is adapted from Nielsen *et al.* (2008) [5]

| Temperature | n   | Egg                                                                                     | First Instar                                                                           | Second Instar                                                                        | Third Instar                                                          | Fourth Instar                                                                        | Fifth Instar                                                                          | Pre-adult                                                               | Survival (%) |
|-------------|-----|-----------------------------------------------------------------------------------------|----------------------------------------------------------------------------------------|--------------------------------------------------------------------------------------|-----------------------------------------------------------------------|--------------------------------------------------------------------------------------|---------------------------------------------------------------------------------------|-------------------------------------------------------------------------|--------------|
| 15°C: MN    | 59  | 21.01 $\pm$ 0.07 <sup>a</sup>                                                           | 26.57 $\pm$ 0.18                                                                       | 38.25 $\pm$ 1.37                                                                     | 32.59 $\pm$ 1.04                                                      | 28.59 $\pm$ 1.23                                                                     | 43.73 $\pm$ 1.72                                                                      | 186.23 $\pm$ 0.78                                                       | 0.00         |
| 15°C: PA    | 50  | 22.00 $\pm$ 0.00 <sup>b</sup><br>( $t_{98} = -7.44$ ,<br>$P = 3.87 \times 10^{-11}$ )   | —                                                                                      | —                                                                                    | —                                                                     | —                                                                                    | —                                                                                     | —                                                                       | 0.00         |
| 17°C: MN    | 50  | 13.23 $\pm$ 0.04 <sup>a</sup>                                                           | 13.20 $\pm$ 0.14 <sup>a</sup>                                                          | 24.95 $\pm$ 0.80 <sup>a</sup>                                                        | 22.16 $\pm$ 1.55                                                      | 21.43 $\pm$ 2.18                                                                     | 17.90 $\pm$ 1.63 <sup>a</sup>                                                         | 103.89 $\pm$ 4.69 <sup>a</sup>                                          | 18.00        |
| 17°C: PA    | 100 | 17.20 $\pm$ 0.08 <sup>b</sup><br>( $t_{148} = -44.39$ ,<br>$P = 2.54 \times 10^{-83}$ ) | 17.01 $\pm$ 0.16 <sup>b</sup><br>( $t_{95} = -17.92$ ,<br>$P = 1.25 \times 10^{-31}$ ) | 30.36 $\pm$ 1.53 <sup>b</sup><br>( $t_{38} = -3.73$ ,<br>$P = 0.006$ )               | 22.40 $\pm$ 4.02                                                      | 23.00 $\pm$ 1.08                                                                     | 28.00 $\pm$ 0.00 <sup>b</sup><br>( $t_7 = -6.20$ ,<br>$P = 0.0002$ )                  | 121.50 $\pm$ 0.50 <sup>b</sup><br>( $t_9 = -3.73$ ,<br>$P = 0.006$ )    | 2.00         |
| 20°C: MN    | 35  | 12.71 $\pm$ 0.11 <sup>a</sup>                                                           | 10.90 $\pm$ 0.10 <sup>a</sup>                                                          | 18.77 $\pm$ 0.37 <sup>a</sup>                                                        | 12.56 $\pm$ 0.90                                                      | 11.15 $\pm$ 0.49 <sup>a</sup>                                                        | 16.46 $\pm$ 0.45 <sup>a</sup>                                                         | 80.67 $\pm$ 1.04                                                        | 68.00        |
| 20°C: PA    | 100 | 11.50 $\pm$ 0.05 <sup>b</sup><br>( $t_{149} = -7.79$ ,<br>$P = 3.83 \times 10^{-9}$ )   | 9.34 $\pm$ 0.08 <sup>b</sup><br>( $t_{118} = 12.03$ ,<br>$P = 2.27 \times 10^{-18}$ )  | 16.25 $\pm$ 0.23 <sup>b</sup><br>( $t_{102} = 5.78$ ,<br>$P = 4.95 \times 10^{-7}$ ) | 11.78 $\pm$ 0.29                                                      | 13.66 $\pm$ 0.31 <sup>b</sup><br>( $t_{95} = -4.33$ ,<br>$P = 8.82 \times 10^{-5}$ ) | 20.16 $\pm$ 0.36 <sup>b</sup><br>( $t_{83} = -6.42$ ,<br>$P = 4.29 \times 10^{-8}$ )  | 81.16 $\pm$ 0.80                                                        | 62.00        |
| 25°C: MN    | 51  | 5.60 $\pm$ 0.07 <sup>a</sup>                                                            | 5.06 $\pm$ 0.10                                                                        | 9.58 $\pm$ 0.18                                                                      | 7.07 $\pm$ 0.17                                                       | 6.52 $\pm$ 0.11 <sup>a</sup>                                                         | 9.06 $\pm$ 0.08 <sup>a</sup>                                                          | 42.62 $\pm$ 0.38 <sup>a</sup>                                           | 86.00        |
| 25°C: PA    | 100 | 6.10 $\pm$ 0.03 <sup>b</sup><br>( $t_{149} = -6.57$ ,<br>$P = 1.08 \times 10^{-9}$ )    | 4.82 $\pm$ 0.10                                                                        | 9.62 $\pm$ 0.21                                                                      | 7.08 $\pm$ 0.22                                                       | 7.38 $\pm$ 0.28 <sup>b</sup><br>( $t_{107} = -2.86$ ,<br>$P = 0.005$ )               | 10.44 $\pm$ 0.28 <sup>b</sup><br>( $t_{103} = -4.74$ ,<br>$P = 1.10 \times 10^{-5}$ ) | 44.92 $\pm$ 0.80 <sup>b</sup><br>( $t_{103} = -2.60$ ,<br>$P = 0.01$ )  | 61.00        |
| 27°C: MN    | 50  | 3.25 $\pm$ 0.04 <sup>a</sup>                                                            | 3.80 $\pm$ 0.04 <sup>a</sup>                                                           | 7.98 $\pm$ 0.15                                                                      | 5.41 $\pm$ 0.11                                                       | 5.38 $\pm$ 0.11 <sup>a</sup>                                                         | 7.46 $\pm$ 0.12                                                                       | 33.21 $\pm$ 0.36 <sup>a</sup>                                           | 94.00        |
| 27°C: PA    | 80  | 4.87 $\pm$ 0.10 <sup>b</sup><br>( $t_{128} = -15.04$ ,<br>$P = 1.20 \times 10^{-27}$ )  | 4.25 $\pm$ 0.05 <sup>b</sup><br>( $t_{128} = -7.03$ ,<br>$P = 1.11 \times 10^{-10}$ )  | 7.64 $\pm$ 0.19                                                                      | 5.49 $\pm$ 0.21                                                       | 5.90 $\pm$ 0.18 <sup>b</sup><br>( $t_{97} = -2.47$ ,<br>$P = 0.02$ )                 | 7.81 $\pm$ 0.28                                                                       | 35.81 $\pm$ 0.52 <sup>b</sup><br>( $t_{87} = -4.11$ ,<br>$P = 0.0001$ ) | 52.50        |
| 30°C: MN    | 50  | 3.00 $\pm$ 0.00                                                                         | 3.02 $\pm$ 0.07 <sup>a</sup>                                                           | 6.60 $\pm$ 0.19 <sup>a</sup>                                                         | 5.41 $\pm$ 0.14 <sup>a</sup>                                          | 5.31 $\pm$ 0.13 <sup>a</sup>                                                         | 8.01 $\pm$ 0.25                                                                       | 30.95 $\pm$ 0.45 <sup>a</sup>                                           | 80.00        |
| 30°C: PA    | 100 | 3.00 $\pm$ 0.00                                                                         | 3.70 $\pm$ 0.05 <sup>b</sup><br>( $t_{142} = -7.03$ ,<br>$P = 8.29 \times 10^{-11}$ )  | 7.05 $\pm$ 0.13 <sup>b</sup><br>( $t_{128} = -2.01$ ,<br>$P = 0.05$ )                | 6.11 $\pm$ 0.28 <sup>b</sup><br>( $t_{117} = -2.23$ ,<br>$P = 0.03$ ) | 6.11 $\pm$ 0.23 <sup>b</sup><br>( $t_{103} = -3.14$ ,<br>$P = 0.002$ )               | 8.47 $\pm$ 0.28                                                                       | 33.39 $\pm$ 0.50 <sup>b</sup><br>( $t_{89} = -3.63$ ,<br>$P = 0.0005$ ) | 51.00        |
| 33°C: MN    | 56  | 3.76 $\pm$ 0.10 <sup>a</sup>                                                            | 3.25 $\pm$ 0.04 <sup>a</sup>                                                           | 5.43 $\pm$ 0.09 <sup>a</sup>                                                         | 6.04 $\pm$ 0.22 <sup>a</sup>                                          | 6.74 $\pm$ 0.53                                                                      | 8.20 $\pm$ 0.25 <sup>a</sup>                                                          | 31.20 $\pm$ 0.56 <sup>a</sup>                                           | 10.00        |
| 33°C: PA    | 95  | 4.00 $\pm$ 0.00 <sup>b</sup><br>( $t_{149} = -2.40$ ,<br>$P = 0.02$ )                   | 3.01 $\pm$ 0.01 <sup>b</sup><br>( $t_{106} = -5.10$ ,<br>$P = 4.51 \times 10^{-6}$ )   | 7.47 $\pm$ 0.23 <sup>b</sup><br>( $t_{76} = -8.26$ ,<br>$P = 6.77 \times 10^{-10}$ ) | 7.45 $\pm$ 0.53 <sup>b</sup><br>( $t_{53} = -2.46$ ,<br>$P = 0.02$ )  | 7.20 $\pm$ 0.40                                                                      | 10.60 $\pm$ 0.81 <sup>b</sup><br>( $t_8 = -2.83$ ,<br>$P = 0.04$ )                    | 37.80 $\pm$ 0.86 <sup>b</sup><br>( $t_8 = -6.43$ ,<br>$P = 0.0004$ )    | 5.00         |

Data are mean  $\pm$  standard error. Estimates for the PA population of BMSB are from Nielsen *et al.* 2008). The ‘n’ denotes sample size (# of eggs) at the beginning of the experiment. For each instar (or phase) at a given temperature, the means in a column followed by a different letter suggest that estimates for the MN and for the PA population of *Halyomorpha halys* are significantly different (t test,  $P < 0.05$ ). Comparisons were not possible for 23°C and 36°C, due to lack of estimates for the PA BMSB. An em dash [—] suggests lack of data owing to 100% mortality.

## References:

1. Rebaudo, F.; Struelens, Q.; Dangles, O. Modelling temperature-dependent development rate and phenology in arthropods: The devRate package for R. *Methods Ecol. Evol.* **2018**, *9*, 1144–1150.
2. Shi, P.; Ikemoto, T.; Egami, C.; Sun, Y.; Ge, F. A modified program for estimating the parameters of the SSI model. *Environ. Entomol.* **2011**, *40*, 462–469.
3. Ratkowsky, D.A.; Olley, J.; McMeekin, T.A.; Ball, A. Relationship between temperature and growth rate of bacterial cultures. *J. Bacteriol.* **1982**, *149*, 1–5.
4. Bahar, M.H.; Soroka, J. J.; Grenkow, L.; Dosdall, L. M. New threshold temperatures for the development of a North American diamondback moth (Lepidoptera: Plutellidae) population and its larval parasitoid, *Diadegma insulare* (Hymenoptera: Ichneumonidae). *Environ. Entomol.* **2014**, *43*, 1443–1452.
5. Nielsen, A.L.; Hamilton, G.C.; Matadha, D. Developmental rate estimation and life table analysis for *Halyomorpha halys* (Hemiptera: Pentatomidae). *Environ. Entomol.* **2008**, *37*, 348–355.
